# Supplementary material
Source: Springer Nature journal article supplement (https://www.springermedizin.de/resource/supplementary/12888_2009_663_MOESM10_ESM.pdf/9478092)

Subgroup within studyStudy nameStatistics for each studyEvents / TotalOdds ratio and 95% CI

|                 |                              | Odds ratio   | Lower limit  | Upper limit  | Black       | White        |
|-----------------|------------------------------|--------------|--------------|--------------|-------------|--------------|
| Co-morbidity    | Compton, 2000 <sup>2</sup>   | 0.855        | 0.578        | 1.265        | 109 / 258   | 77 / 167     |
| Co-morbidity    | Coid, 2000 <sup>4</sup>      | 0.217        | 0.151        | 0.313        | 33 / 628    | 452 / 2224   |
| Co-morbidity    | Maden, 1999 <sup>1</sup>     | 0.221        | 0.088        | 0.558        | 6 / 100     | 28 / 125     |
| Co-morbidity    | Trestman, 2007 <sup>7</sup>  | 0.836        | 0.561        | 1.247        | 75 / 177    | 102 / 218    |
| Co-morbidity    | Coid, 1999 <sup>5</sup>      | 0.209        | 0.145        | 0.301        | 33 / 648    | 470 / 2303   |
| Co-morbidity    |                              | <b>0.381</b> | <b>0.190</b> | <b>0.764</b> |             |              |
| No co-morbidity | Castaneda, 1985 <sup>3</sup> | 0.613        | 0.368        | 1.023        | 25 / 558    | 41 / 577     |
| No co-morbidity | Trestman, 2007 <sup>7</sup>  | 0.400        | 0.107        | 1.502        | 3 / 177     | 9 / 218      |
| No co-morbidity | Huang, 2006 <sup>8</sup>     | 1.164        | 1.087        | 1.245        | 1368 / 8245 | 3578 / 24507 |
| No co-morbidity |                              | <b>0.789</b> | <b>0.432</b> | <b>1.441</b> |             |              |

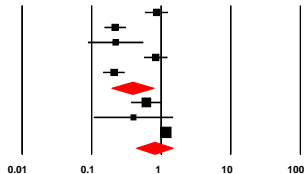

Supplement: MOESM10 [file 9478092]
